# Supplementary material for: Mitigating RNA Toxicity in Myotonic Dystrophy using Small Molecules
Source: PubMed Central journal article supplement (PMC6720693; doi:10.3390/ijms20164017), 2019-08-17
Supplement: ijms-20-04017-s001.pdf [file ijms-20-04017-s001.pdf]

**TABLE 1. Small molecules that target the toxic RNA through rational design.**

| COMPOUND <sup>1</sup><br>STRUCTURE <sup>2</sup>                                                      | MODEL <sup>3</sup>                                                                                                        | ACTIVE<br>CONC. <sup>4</sup>                     | OBSERVATION <sup>5</sup>                                                                                                                    |
|------------------------------------------------------------------------------------------------------|---------------------------------------------------------------------------------------------------------------------------|--------------------------------------------------|---------------------------------------------------------------------------------------------------------------------------------------------|
| Ligand 1<br>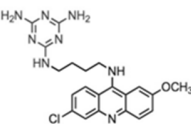        | MBNL1:r(CUG) <sub>4/12</sub>                                                                                              | ~50uM                                            | CUG-MBNL1 complex disruption                                                                                                                |
| Ligand 3<br>        | MBNL1:r(CUG) <sub>12</sub><br>DM1 HeLa cell                                                                               | ~10uM<br>50-100uM                                | CUG-MBNL1 complex disruption<br>Foci reduction, minigene mis-splicing rescue                                                                |
| (New) Ligand 9<br>  | (CTG-CAG) <sub>74</sub><br>r(CUG) <sub>16</sub><br>DM1 HeLa cell                                                          | 50-100uM<br>5-100uM<br>25-150uM                  | Transcription inhibition<br>Cleaved hairpin structure<br>Foci reduction, minigene mis-splicing rescue, reduced r(CUG) <sub>exp</sub> levels |
| Ligand 4<br>       | (CTG-CAG) <sub>74</sub><br>r(CUG) <sub>16</sub><br>DM1 HeLa cell                                                          | 0.05-0.4uM<br>0.2-4uM                            | Transcription inhibition<br>Cooperative binding<br>Foci reduction, minigene mis-splicing rescue, reduced r(CUG) <sub>exp</sub> levels       |
| DAP<br>           | r(CUG) <sub>9</sub> or r(CAG) <sub>9</sub><br>d(CUG) <sub>20</sub> luciferase reporter                                    | 25uM                                             | Higher binding affinity for r(CUG) <sub>9</sub><br>Decrease luciferase expression                                                           |
| DDAP<br>          | r(CUG) <sub>9</sub> or r(CAG) <sub>9</sub><br>MBNL1:r(CUG) <sub>20</sub><br>DM1 C2C12 cell<br>DM1 HSA <sup>LR</sup> mouse | 30-120nM<br>10-200nM<br>10-40uM<br>20 or 50mg/kg | Higher binding affinity for r(CUG) <sub>9</sub><br>CUG-MBNL1 complex disruption<br>Mis-splicing rescue<br>Mis-splicing rescue               |
| 2K-4 and 3K-4<br> | MBNL1:r(CCUG) <sub>24</sub><br>DM2 C2C12 cell                                                                             | 8-50nM<br>5-20uM                                 | CCUG-MBNL1 complex disruption<br>Minigene mis-splicing rescue                                                                               |

|                                                                                                                                                         |                                                          |                  |                                                                                                |
|---------------------------------------------------------------------------------------------------------------------------------------------------------|----------------------------------------------------------|------------------|------------------------------------------------------------------------------------------------|
| Ligands 6, 8, 10, 11<br>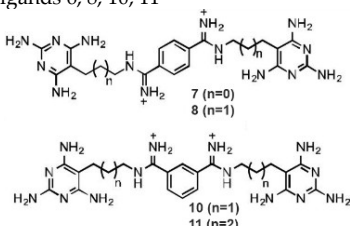<br>7 (n=0)<br>8 (n=1)<br>10 (n=1)<br>11 (n=2) | MBNL1:r(CCUG) <sub>8</sub><br>DM2 HeLa cell              | 15-75uM<br>100uM | CCUG-MBNL1 complex disruption<br>Foci reduction                                                |
| Bis-benzimidazole<br>                                                  | MBNL1:r(CUG) <sub>109</sub>                              | 110uM            | CUG-MBNL1 complex disruption                                                                   |
| 2H-4<br><br>4                                                          | MBNL1:r(CUG) <sub>109</sub><br>DM1 HeLa cell             | 11uM<br>5-25uM   | CUG-MBNL1 complex disruption<br>Minigene mis-splicing rescue, foci reduction                   |
| 2H-K4NMeS<br>                                                        | MBNL1:r(CUG) <sub>12</sub><br>DM1 patient-derived cell   | 10nM             | CUG-MBNL1 complex disruption<br>Foci reduction, mis-splicing rescue                            |
| Cugamycin<br><br>3<br>#                                              | DM1 patient-derived cell<br>DM1 HSA <sup>L-R</sup> mouse | 1-4uM<br>10mg/kg | Foci reduction, mis-splicing rescue<br>Foci reduction, mis-splicing rescue,<br>myotonia rescue |

<sup>1</sup> Name of compound.

<sup>2</sup> Chemical structure of compound.

<sup>3</sup> *In vitro* or *in vivo* model used.

<sup>4</sup> Concentrations/ranges or doses where effect was observed in DM model (micromolar concentrations or mg/kg of body weight doses).

<sup>5</sup> Observations of compound effect on DM molecular pathogenesis or phenotypes in DM model used.

**TABLE 2. Small molecules identified via screens that target toxic CUG RNA.**

| COMPOUND <sup>1</sup><br>STRUCTURE <sup>2</sup>                                                     | MODEL <sup>3</sup>                                                                                        | ACTIVE<br>CONC. <sup>4</sup>               | OBSERVATION <sup>5</sup>                                                                                                                                                                          |
|-----------------------------------------------------------------------------------------------------|-----------------------------------------------------------------------------------------------------------|--------------------------------------------|---------------------------------------------------------------------------------------------------------------------------------------------------------------------------------------------------|
| Compound 4<br>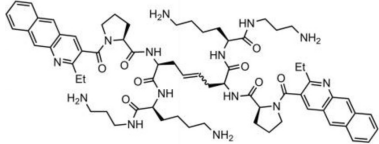     | MBNL1::r(CUG) <sub>109</sub><br>DM1 HSA <sup>LR</sup> mouse                                               | 1-100uM<br>40mg/kg                         | CUG-MBNL1 complex disruption<br>Mis-splicing rescue                                                                                                                                               |
| Compound 11<br>    | MBNL1::r(CUG) <sub>109</sub><br>DM1 HSA <sup>LR</sup> mouse                                               | 1-100uM<br>40mg/kg                         | CUG-MBNL1 complex disruption<br>Mis-splicing rescue                                                                                                                                               |
| Pentamidine<br>    | DM1 HeLa cell<br>(CTG-CAG) <sub>54</sub><br>DM1 HSA <sup>LR</sup> mouse                                   | 10-75uM<br>10-100uM<br>25-40mg/kg          | Foci reduction, minigene mis-splicing rescue, reduced r(CUG) <sub>exp</sub> levels<br>Transcription inhibition<br>Mis-splicing rescue                                                             |
| Heptamidine<br>    | DM1 HeLa cell<br>DM1 HSA <sup>LR</sup> mouse                                                              | 5-15uM<br>25-40mg/kg                       | Minigene mis-splicing rescue<br>Mis-splicing rescue, reduced r(CUG) <sub>exp</sub> levels, myotonia rescue                                                                                        |
| Furamidine<br>    | MBNL1::r(CUG) <sub>4</sub><br>DM1 HeLa cell<br>DM1 patient-derived cell                                   | 10-125uM<br>20-80uM<br>0.25-4uM            | CUG-MBNL1 complex disruption<br>Foci reduction, mis-splicing rescue<br>Foci reduction, mis-splicing rescue, rescued gene expression, increase MBNL1/2 protein levels                              |
|                                                                                                     | DM1 HSA <sup>LR</sup> mouse                                                                               | 10-30mg/kg                                 | Mis-splicing rescue, rescued gene expression, reduced r(CUG) <sub>exp</sub> levels                                                                                                                |
| Neomycin<br>     | MBNL1::r(CUG) <sub>100</sub>                                                                              | 4-64uM                                     | CUG-MBNL1 complex disruption                                                                                                                                                                      |
| Erythromycin<br> | MBNL1::r(CUG) <sub>100</sub><br>DM1 C2C12 cell<br>DM1 patient-derived cell<br>DM1 HSA <sup>LR</sup> mouse | 4-64uM<br>50uM<br>25-100uM<br>150-900mg/kg | CUG-MBNL1 complex disruption<br>Foci reduction, mis-splicing rescue<br>Foci reduction, mis-splicing rescue<br>Mis-splicing rescue, myotonia rescue                                                |
| Lomofungin<br>   | MBNL1::r(CUG) <sub>12</sub><br>DM1 fluc800 cell                                                           | 0.01-1uM<br>10uM                           | CUG-MBNL1 complex disruption<br>Increased nucleoplasmic MBNL1 levels                                                                                                                              |
|                                                                                                     | DM1 C2C12 cell                                                                                            | 10uM                                       | Mis-splicing rescue                                                                                                                                                                               |
| Ro 31-8220<br>   | DM1 patient-derived cell<br>DM2 patient-derived cell<br>DM1 Zebrafish                                     | 5-10uM<br>5-10uM<br>5uM                    | Foci reduction, mis-splicing rescue, downregulation of CELF1 levels, increased cytoplasmic levels of MBNL<br>Foci reduction, increased cytoplasmic levels of MBNL<br>Body length phenotype rescue |

|                                                                                                     |                             |             |                                                                                                           |
|-----------------------------------------------------------------------------------------------------|-----------------------------|-------------|-----------------------------------------------------------------------------------------------------------|
|                                                                                                     | DM1 heart-specific mouse    | 6mg/kg      | Improved cardiac conduction and contractile abnormalities, mis-splicing rescue                            |
| APB1 peptide<br>Ac-ppyawe-NH <sub>2</sub> <sup>*</sup>                                              | DM1 Drosophila              | 40-250uM    | Increased muscle area, rescued eye and muscle degeneration, foci reduction                                |
|                                                                                                     | DM1 HSA <sup>LR</sup> mouse | 0.5 or 10ug | Mis-splicing rescue, increased Clcn1 expression, reduced central nuclei                                   |
| Daunorubicin<br>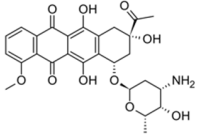   | MBNL1:τ(CUG) <sub>26</sub>  | 10uM        | CUG-MBNL1 complex disruption                                                                              |
|                                                                                                     | DM1 patient-derived cell    | 3-10uM      | Foci reduction                                                                                            |
|                                                                                                     | DM1 Drosophila              | 1uM         | Rescued cardiac dysfunction, increased survival, foci reduction, mis-splicing rescue                      |
| Chromomycin A3<br> | DM1 patient-derived cell    | 0.04-4uM    | Foci reduction, mis-splicing rescue, downregulation of CELF1 levels, increased cytoplasmic levels of MBNL |
|                                                                                                     | DM1 patient-derived cell    | 0.04-4uM    | Foci reduction, increased cytoplasmic levels of MBNL                                                      |

<sup>1</sup> Name of compound.

<sup>2</sup> Chemical structure of compound.

<sup>3</sup> *In vitro* or *in vivo* model used.

<sup>4</sup> Concentrations/ranges or doses where effect was observed in DM model (micromolar concentrations or mg/kg of body weight doses).

<sup>5</sup> Observations of compound effect on DM molecular pathogenesis or phenotypes in DM model used.

\*Represents the lower case one-letter code for D-amino acids.

**TABLE 3. Small molecules that upregulate MBNL protein levels.**

| COMPOUND <sup>1</sup><br>STRUCTURE <sup>2</sup>                                                           | MODEL <sup>3</sup>                             | ACTIVE<br>CONC. <sup>4</sup> | OBSERVATION <sup>5</sup>                                                                                                                      |
|-----------------------------------------------------------------------------------------------------------|------------------------------------------------|------------------------------|-----------------------------------------------------------------------------------------------------------------------------------------------|
| ISOX<br>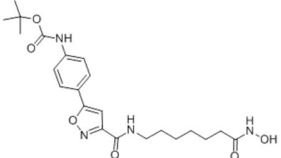                 | MBNL-tag HeLa cell<br>DM1 patient-derived cell | 1-6uM<br>5uM                 | Increased MBNL1 protein levels<br>Increased MBNL1 protein levels, mis-splicing rescue                                                         |
| Vorinostat<br>           | MBNL-tag HeLa cell<br>DM1 patient-derived cell | 1-6uM<br>5uM                 | Increased MBNL1 protein levels<br>Increased MBNL1 protein levels, mis-splicing rescue                                                         |
| Phenylbutazone (PBZ)<br> | C2C12 cell<br>DM1 HSA <sup>1R</sup> mouse      | 50-950uM<br>16.7mg/kg        | Increased <i>Mbnl1</i> expression<br>Increased Mbnl1 protein levels, mis-splicing rescue, improved grip strength, reduction of central nuclei |

<sup>1</sup> Name of compound.  
<sup>2</sup> Chemical structure of compound.  
<sup>3</sup> *In vitro* or *in vivo* model used.  
<sup>4</sup> Concentrations/ranges or doses where effect was observed in DM model (micromolar concentrations or mg/kg of body weight doses).  
<sup>5</sup> Observations of compound effect on DM molecular pathogenesis or phenotypes in DM model used.

**TABLE 4. Small molecules that affect downstream signaling pathways or restore CUGBP1 activity.**

| COMPOUND <sup>1</sup><br>STRUCTURE <sup>2</sup>                                                     | MODEL <sup>3</sup>                                                       | ACTIVE<br>CONC. <sup>4</sup>            | OBSERVATION <sup>5</sup>                                                                                                 |
|-----------------------------------------------------------------------------------------------------|--------------------------------------------------------------------------|-----------------------------------------|--------------------------------------------------------------------------------------------------------------------------|
| Manumycin A<br>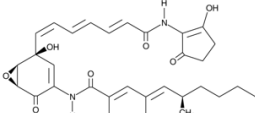    | DM1 C2C12 cell<br>DM1 HSA <sup>LR</sup> mouse                            | 10-40uM                                 | Mis-splicing rescue<br>Mis-splicing rescue                                                                               |
| Lithium<br>Li <sup>+</sup>                                                                          | DM1 HSA <sup>LR</sup> mouse                                              | 0.24% diet                              | Improved grip strength, reduced central nuclei, myotonia rescue                                                          |
| TDZD-8<br>         | DM1 HSA <sup>LR</sup> mouse                                              | 10mg/kg                                 | Improved grip strength, myotonia rescue                                                                                  |
| Tideglusib<br>     | Phase II clinical trials                                                 | 400mg, 1000mg                           | Safety and efficiency                                                                                                    |
| Actinomycin D<br> | DM1 HeLa cell<br>DM1 patient-derived cell<br>DM1 HSA <sup>LR</sup> mouse | 0.005-0.02uM<br>5-10nM<br>1.25-2.5mg/kg | Foci reduction, reduction of r(CUG) <sub>exp</sub> levels<br>Reduced r(CUG) <sub>exp</sub> levels<br>Mis-splicing rescue |
| C-16<br>         | DM1 patient-derived cell                                                 | 1uM                                     | Downregulation of CELF1, foci reduction, mis-splicing rescue                                                             |
| C-51<br>         | DM1 patient-derived cell                                                 | 30uM                                    | Downregulation of CELF1, foci reduction, mis-splicing rescue                                                             |

<sup>1</sup> Name of compound.

<sup>2</sup> Chemical structure of compound.

<sup>3</sup> *In vitro* or *in vivo* model used.

<sup>4</sup> Concentrations/ranges or doses where effect was observed in DM model (micromolar concentrations or mg/kg of body weight doses).

<sup>5</sup> Observations of compound effect on DM molecular pathogenesis or phenotypes in DM model used.

**TABLE 5. Small molecules that block transcription of the CTG expansion.**

| COMPOUND <sup>1</sup><br>STRUCTURE <sup>2</sup>                                                    | MODEL <sup>3</sup>                                                           | ACTIVE<br>CONC. <sup>4</sup>                | OBSERVATION <sup>5</sup>                                                                                                 |
|----------------------------------------------------------------------------------------------------|------------------------------------------------------------------------------|---------------------------------------------|--------------------------------------------------------------------------------------------------------------------------|
| Actinomycin D<br>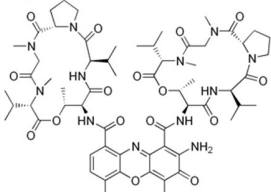 | DM1 HeLa cell<br><br>DM1 patient-derived cell<br>DM1 HSA <sup>LR</sup> mouse | 0.005-0.02uM<br><br>5-10nM<br>1.25-2.5mg/kg | Foci reduction, reduction of r(CUG) <sub>exp</sub> levels<br>Reduced r(CUG) <sub>exp</sub> levels<br>Mis-splicing rescue |

<sup>1</sup> Name of compound.

<sup>2</sup> Chemical structure of compound.

<sup>3</sup> *In vitro* or *in vivo* model used.

<sup>4</sup> Concentrations/ranges or doses where effect was observed in DM model (micromolar concentrations or mg/kg of body weight doses).

<sup>5</sup> Observations of compound effect on DM molecular pathogenesis or phenotypes in DM model used.
